# Supplementary material
Source: PubMed Central journal article supplement (PMC5263111)

**Cohort**

VACS (n=37)  
GSE67751 (n=92)

**Fixed effect model**

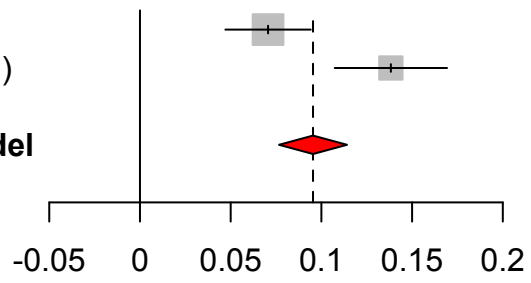

Supplement: NIHMS834631-supplement-Supplemental_Fig_4.pdf [file NIHMS834631-supplement-Supplemental_Fig_4.pdf]
